# Supplementary material for: Mass Spectrometry in Pharmacokinetic Studies of a Synthetic Compound for Spinal Cord Injury Treatment
Source: Hindawi journal article supplement (doi:10.1155/2015/169234), 2015-01-01
Supplement: f1 [file 169234.f1.pdf]

# Supporting information for

## **Mass spectrometry in pharmacokinetic studies of a synthetic compound for spinal cord injury treatment.**

María Sánchez-Sierra<sup>1</sup>, Isabel García-Álvarez<sup>1</sup>, Alfonso Fernández-Mayoralas<sup>2</sup>, Sandra Moreno-Lillo<sup>1</sup>, Gemma Barroso García<sup>3</sup>, Verónica Moral Dardé<sup>3</sup>, Ernesto Doncel-Pérez <sup>1\*</sup>

1) Grupo de Química Neuro-regenerativa, Hospital Nacional de Paraplégicos, Servicio de Salud de Castilla La Mancha (SESCAM), Finca La Peraleda s/n, 45071 Toledo, Spain.

2) Instituto de Química Orgánica General, CSIC, Juan de la Cierva 3, 28006 Madrid, Spain.

3) Servicio de Proteómica, Hospital Nacional de Paraplégicos, Servicio de Salud de Castilla La Mancha (SESCAM), Finca La Peraleda s/n, 45071 Toledo, Spain.

Uniformed

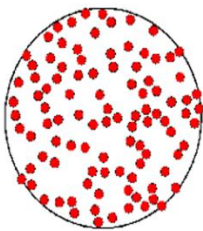

Centered

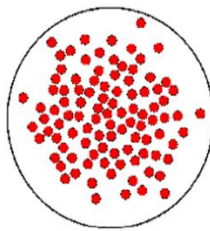

Bordered

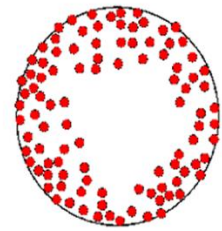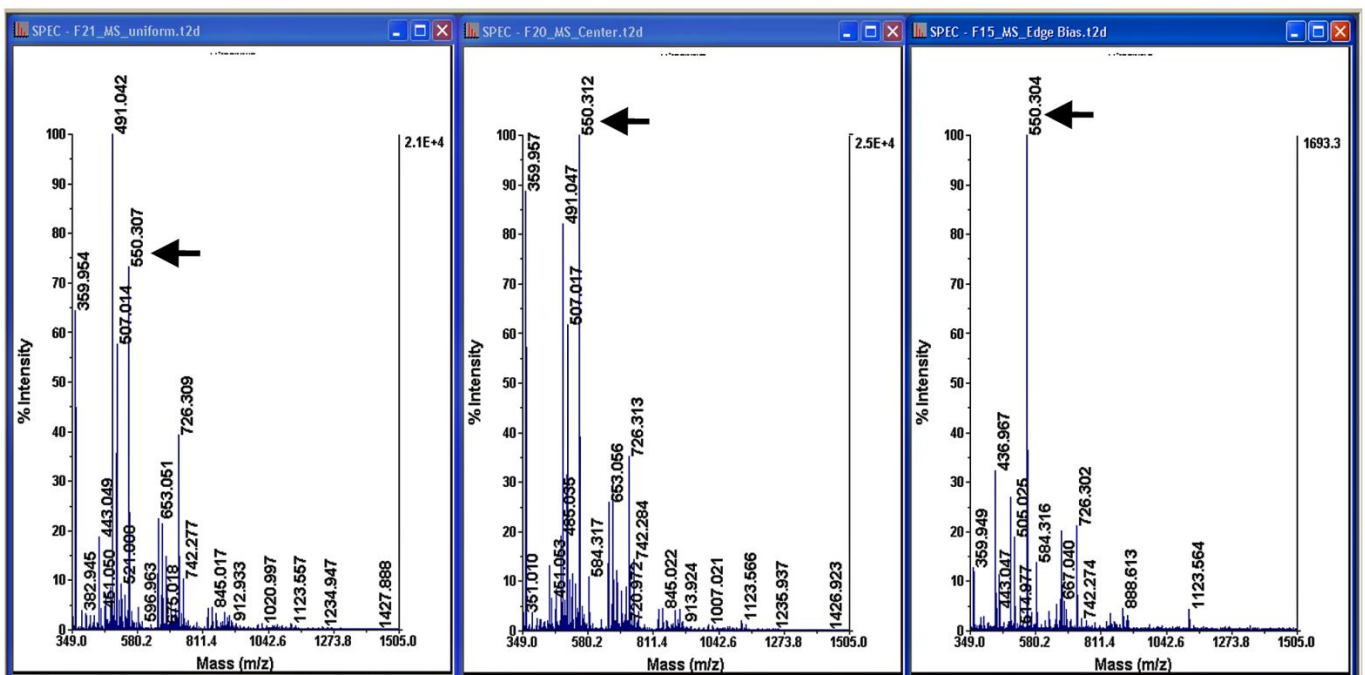

**Figure 1** Examples of acquisition of samples in MALDI-TOF MS analysis in this study. In circles ways of sample acquisition, below examples of mass spectrums in each case. Arrows for IG20 signal at 550,3 m/z.

# Qualitative Compound Report

|                 |                          |                        |                                   |
|-----------------|--------------------------|------------------------|-----------------------------------|
| Data File       | 6287_ig_20_oct_2013_01.d | Sample Name            | Unavailable                       |
| Sample Type     | Unavailable              | Position               | Unavailable                       |
| Instrument Name | Unavailable              | User Name              | Unavailable                       |
| Acq Method      |                          | IRM Calibration Status | Success                           |
| DA Method       | QualDAMethod.m           | Comment                | Sample information is unavailable |

## Compound Table

| Compound Label        | RT    | Mass     | Abund | Formula        | Tgt Mass | Diff (ppm) |
|-----------------------|-------|----------|-------|----------------|----------|------------|
| Cpd 1: C26 H48 N O9 S | 0.612 | 550.3039 | 17028 | C26 H48 N O9 S | 550.305  | -1.92      |

| Compound Label        | RT    | Algorithm       | Mass     |
|-----------------------|-------|-----------------|----------|
| Cpd 1: C26 H48 N O9 S | 0.612 | Find By Formula | 550.3039 |

## MS Zoomed Spectrum

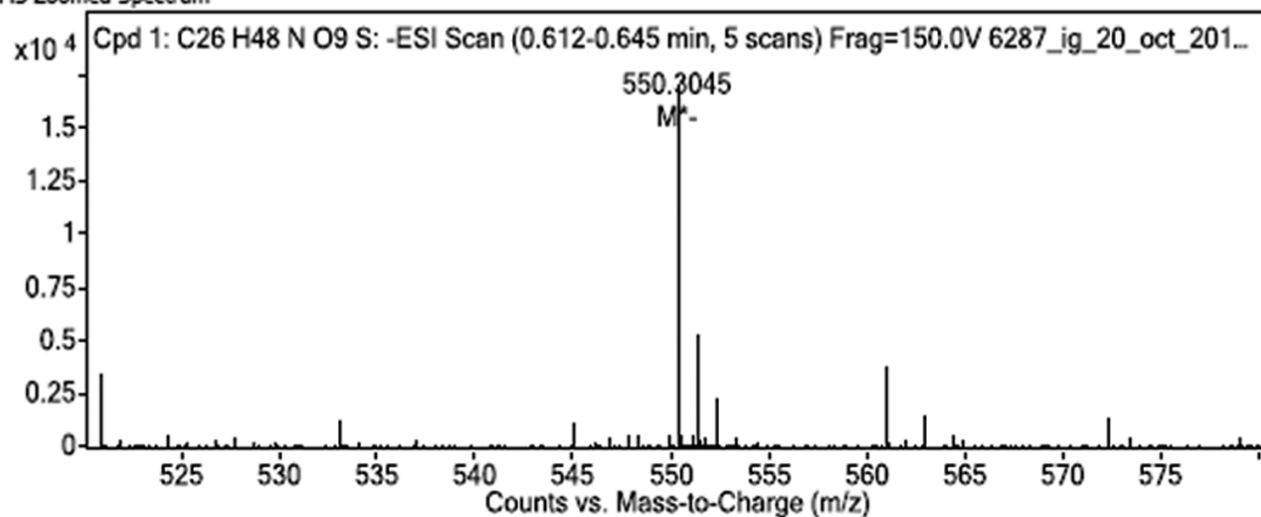

## MS Spectrum Peak List

| m/z      | Calc m/z | Diff(ppm) | z | Abund   | Formula        | Ion            |
|----------|----------|-----------|---|---------|----------------|----------------|
| 112.9855 |          |           |   | 1030501 |                |                |
| 113.0529 |          |           |   | 26526   |                |                |
| 113.0819 |          |           |   | 79022   |                |                |
| 113.1143 |          |           |   | 13098   |                |                |
| 113.1392 |          |           |   | 8905    |                |                |
| 113.1597 |          |           |   | 6448    |                |                |
| 113.1835 |          |           |   | 6726    |                |                |
| 113.2082 |          |           |   | 7051    |                |                |
| 113.988  |          |           |   | 35159   |                |                |
| 550.3045 | 550.3055 | -1.88     | 1 | 17028   | C26 H48 N O9 S | M <sup>+</sup> |

--- End Of Report ---

**Figure 2. Qualitative compound report for IG20 by ESI-MS analysis.** The final product in the IG20 synthesis was analyzed by Electrospray Ionization Mass Spectrometry, in ion negative mode. The mass/charge at 550.30 and purity of IG20 is shown.

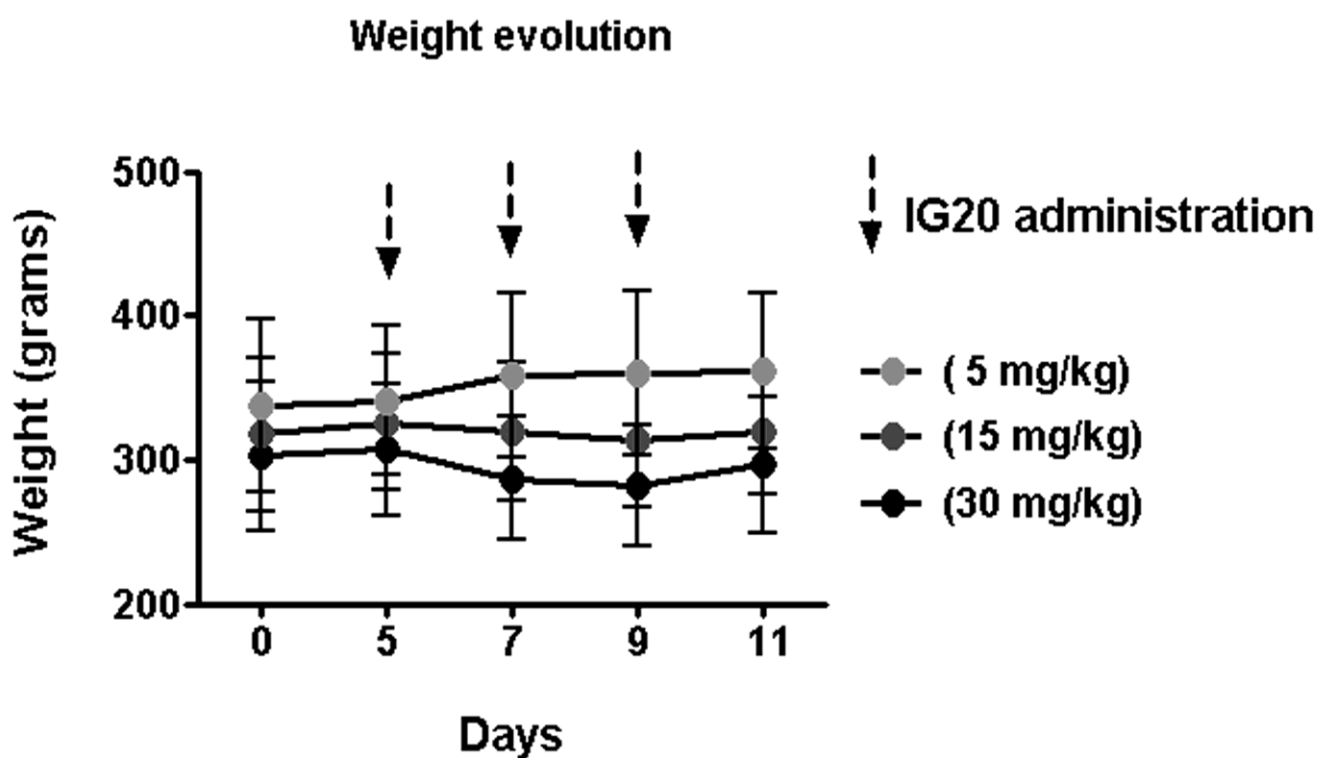

**Figure 3. Evolution of weight in rats injected with IG20 compound.** Normal adult rats were injected every two days with different concentrations of IG20 compound. The gaining of weight was used as a health parameter. There was not significant difference in between groups of animals during the period assayed. The higher concentration of IG20 (30mg/kg) was selected for successive experiments.
